# Supplementary material
Source: PubMed Central journal article supplement (PMC4239845)
Supplement: hesr0049-1184-sd1.pdf [file hesr0049-1184-sd1.pdf]

Appendix 1: Proportions for the Unadjusted and Adjusted Samples. 1990

| Variables:                               | All Deliveries                    |                                             |            |         |                                   |                                             |               |         | Deliveries with Birthweight $\leq$ 2500 g |                                             |               |         |                                   |                                             |               |         |
|------------------------------------------|-----------------------------------|---------------------------------------------|------------|---------|-----------------------------------|---------------------------------------------|---------------|---------|-------------------------------------------|---------------------------------------------|---------------|---------|-----------------------------------|---------------------------------------------|---------------|---------|
|                                          | Unadjusted                        |                                             |            |         | Propensity Score Adjusted         |                                             |               |         | Unadjusted                                |                                             |               |         | Propensity Score Adjusted         |                                             |               |         |
|                                          | Central/<br>Regional<br>Hospitals | Local<br>Hospitals/<br>Maternity<br>Clinics | Chi Square | P-Value | Central/<br>Regional<br>Hospitals | Local<br>Hospitals/<br>Maternity<br>Clinics | Chi<br>Square | P-Value | Central/<br>Regional<br>Hospitals         | Local<br>Hospitals/<br>Maternity<br>Clinics | Chi<br>Square | P-Value | Central/<br>Regional<br>Hospitals | Local<br>Hospitals/<br>Maternity<br>Clinics | Chi<br>Square | P-Value |
| Characteristics of the mother            |                                   |                                             |            |         |                                   |                                             |               |         |                                           |                                             |               |         |                                   |                                             |               |         |
| Mother's age <sup>†</sup>                |                                   |                                             |            |         |                                   |                                             |               |         |                                           |                                             |               |         |                                   |                                             |               |         |
| < 20 years=1                             | 0.0421                            | 0.0474                                      | 13.0644    | 0.0110  | 0.0405                            | 0.0408                                      | 0.6074        | 0.9622  | 0.0538                                    | 0.1028                                      | 12.9242       | 0.0177  | 0.0528                            | 0.0548                                      | 2.1699        | 0.7045  |
| 31-35 years=1                            | 0.2038                            | 0.2105                                      |            |         | 0.2090                            | 0.2115                                      |               |         | 0.2220                                    | 0.2347                                      |               |         | 0.2247                            | 0.2484                                      |               |         |
| 36-40 years=1                            | 0.0576                            | 0.0540                                      |            |         | 0.0569                            | 0.0560                                      |               |         | 0.0763                                    | 0.0675                                      |               |         | 0.0765                            | 0.0576                                      |               |         |
| > 40 years=1                             | 0.0075                            | 0.0076                                      |            |         | 0.0075                            | 0.0073                                      |               |         | 0.0104                                    | 0.0096                                      |               |         | 0.0105                            | 0.0082                                      |               |         |
| Mother's immigration status <sup>§</sup> |                                   |                                             |            |         |                                   |                                             |               |         |                                           |                                             |               |         |                                   |                                             |               |         |
| Non-western immigrant=1                  | 0.0504                            | 0.0200                                      | 255.2261   | 0.0000  | 0.0326                            | 0.0353                                      | 2.5395        | 0.2809  | 0.0481                                    | 0.0353                                      | 1.9906        | 0.3696  | 0.0319                            | 0.0432                                      | 2.5994        | 0.2726  |
| Western immigrant=1                      | 0.0218                            | 0.0183                                      |            |         | 0.0188                            | 0.0186                                      |               |         | 0.0208                                    | 0.0128                                      |               |         | 0.0170                            | 0.0076                                      |               |         |
| Mother's education <sup>‡</sup>          |                                   |                                             |            |         |                                   |                                             |               |         |                                           |                                             |               |         |                                   |                                             |               |         |
| Upper secondary school=1                 | 0.4174                            | 0.4381                                      | 42.6257    | 0.0000  | 0.4238                            | 0.4257                                      | 0.2866        | 0.8665  | 0.3855                                    | 0.4444                                      | 7.4357        | 0.0243  | 0.3968                            | 0.3857                                      | 0.2259        | 0.8932  |
| University/college=1                     | 0.2439                            | 0.2179                                      |            |         | 0.2435                            | 0.2440                                      |               |         | 0.2119                                    | 0.1503                                      |               |         | 0.2094                            | 0.2067                                      |               |         |
| Married/cohabitant=1                     | 0.9035                            | 0.9262                                      | 62.2901    | 0.0000  | 0.9134                            | 0.9137                                      | 0.0086        | 0.9261  | 0.8832                                    | 0.8834                                      | 0.0002        | 0.9881  | 0.8889                            | 0.8906                                      | 0.0080        | 0.9288  |
| Predisposing factors - mother            |                                   |                                             |            |         |                                   |                                             |               |         |                                           |                                             |               |         |                                   |                                             |               |         |
| Asthma=1                                 | 0.0196                            | 0.0231                                      | 7.0344     | 0.0080  | 0.0203                            | 0.0202                                      | 0.0074        | 0.9313  | 0.0248                                    | 0.0225                                      | 0.0658        | 0.7975  | 0.0251                            | 0.0240                                      | 0.0143        | 0.9049  |
| Diabetes=1                               | 0.0037                            | 0.0008                                      | 30.7956    | 0.0000  | 0.0028                            | 0.0030                                      | 0.2158        | 0.6422  | 0.0104                                    | 0.0064                                      | 0.4494        | 0.5026  | 0.0089                            | 0.0054                                      | 0.4002        | 0.5270  |
| Epilepsy=1                               | 0.0061                            | 0.0040                                      | 8.6413     | 0.0033  | 0.0053                            | 0.0053                                      | 0.0019        | 0.9651  | 0.0064                                    | 0.0064                                      | 0.0000        | 0.9991  | 0.0053                            | 0.0054                                      | 0.0015        | 0.9696  |
| Heart disease=1                          | 0.0015                            | 0.0013                                      | 0.3072     | 0.5794  | 0.0014                            | 0.0014                                      | 0.0011        | 0.9741  | 0.0032                                    | 0.0000                                      | 1.0021        | 0.3168  | 0.0028                            | 0.0000                                      | 0.8871        | 0.3463  |
| Chronic hypertension=1                   | 0.0031                            | 0.0031                                      | 0.0078     | 0.9298  | 0.0031                            | 0.0031                                      | 0.0001        | 0.9941  | 0.0080                                    | 0.0096                                      | 0.0885        | 0.7662  | 0.0090                            | 0.0098                                      | 0.0232        | 0.8789  |
| Chronic kidney failure=1                 | 0.0008                            | 0.0007                                      | 0.1052     | 0.7457  | 0.0008                            | 0.0007                                      | 0.0659        | 0.7975  | 0.0016                                    | 0.0000                                      | 0.5003        | 0.4794  | 0.0016                            | 0.0000                                      | 0.5064        | 0.4767  |
| Rheumatoid arthritis=1                   | 0.0045                            | 0.0037                                      | 1.2691     | 0.2599  | 0.0043                            | 0.0041                                      | 0.1509        | 0.6977  | 0.0032                                    | 0.0032                                      | 0.0000        | 0.9994  | 0.0032                            | 0.0000                                      | 1.0142        | 0.3139  |
| Preeclampsia=1                           | 0.0342                            | 0.0242                                      | 35.6457    | 0.0000  | 0.0320                            | 0.0322                                      | 0.0099        | 0.9207  | 0.1453                                    | 0.1350                                      | 0.2392        | 0.6248  | 0.1498                            | 0.1420                                      | 0.1324        | 0.7159  |
| Bleeding during pregnancy=1              | 0.0184                            | 0.0188                                      | 0.0781     | 0.7799  | 0.0186                            | 0.0177                                      | 0.4534        | 0.5007  | 0.6156                                    | 0.0322                                      | 4.3119        | 0.0378  | 0.0612                            | 0.0392                                      | 2.4176        | 0.1200  |
| Characteristics of the birth             |                                   |                                             |            |         |                                   |                                             |               |         |                                           |                                             |               |         |                                   |                                             |               |         |
| Birthweight $\leq$ 2500g=1               | 0.0541                            | 0.0214                                      | 266.2322   | 0.0000  | 0.0449                            | 0.0449                                      | 0.0007        | 0.9784  |                                           |                                             |               |         |                                   |                                             |               |         |
| Gestation length < 37 weeks=1            | 0.0739                            | 0.0402                                      | 188.4345   | 0.0000  | 0.06499                           | 0.0636                                      | 0.3086        | 0.5785  | 0.7001                                    | 0.4945                                      | 47.4398       | 0.0000  | 0.6767                            | 0.6692                                      | 0.0699        | 0.7915  |
| Abnormal presentation=1                  | 0.0570                            | 0.0489                                      | 13.8118    | 0.0002  | 0.0549                            | 0.0541                                      | 0.1301        | 0.7183  | 0.1321                                    | 0.0900                                      | 4.4055        | 0.0358  | 0.1246                            | 0.1135                                      | 0.3160        | 0.5740  |
| Single baby birth=1                      | 0.9712                            | 0.9847                                      | 80.8769    | 0.0000  | 0.9731                            | 0.9731                                      | 0.2188        | 0.6399  | 0.7690                                    | 0.8135                                      | 3.1198        | 0.0773  | 0.7674                            | 0.7699                                      | 0.0096        | 0.9221  |
| Previous Caesarean section=1             | 0.0678                            | 0.0676                                      | 0.0071     | 0.9330  | 0.0674                            | 0.0667                                      | 0.0638        | 0.8006  | 0.0955                                    | 0.0803                                      | 0.7504        | 0.3863  | 0.0941                            | 0.1008                                      | 0.1466        | 0.7018  |
| Infant boy=1                             | 0.5130                            | 0.5157                                      | 0.3354     | 0.5625  | 0.5135                            | 0.5117                                      | 0.1367        | 0.7116  | 0.4855                                    | 0.4565                                      | 0.9280        | 0.3354  | 0.4770                            | 0.4712                                      | 0.0371        | 0.8472  |

<sup>†</sup> Reference category: 20-30 years<sup>§</sup> Reference category: Norwegian mothers<sup>‡</sup> Reference category: Compulsory school

Appendix 2: Unadjusted and Adjusted Effects of Type of Hospital on the Probability of Dying within One Month After Birth (Neonatal Mortality) According to Year. All Deliveries. Non-Overlapping 95% Confidence Intervals in Bold

| Year | Unadjusted                        |                                    | Propensity score adjusted         |                                    |
|------|-----------------------------------|------------------------------------|-----------------------------------|------------------------------------|
|      | Central/regional hospitals        | Local hospitals/ maternity clinics | Central/regional hospitals        | Local hospitals/ maternity clinics |
| 1980 | <b>0.0060</b><br>[0.0052, 0.0069] | <b>0.0033</b><br>[0.0026, 0.0043]  | 0.0048<br>[0.0041, 0.0056]        | 0.0037<br>[0.0029, 0.0048]         |
| 1981 | <b>0.0055</b><br>[0.0047, 0.0063] | <b>0.0027</b><br>[0.0020, 0.0036]  | 0.0042<br>[0.0035, 0.0049]        | 0.0031<br>[0.0024, 0.0041]         |
| 1982 | <b>0.0052</b><br>[0.0045, 0.0061] | <b>0.0032</b><br>[0.0024, 0.0041]  | 0.0043<br>[0.0036, 0.0050]        | 0.0034<br>[0.0026, 0.0045]         |
| 1983 | <b>0.0060</b><br>[0.0052, 0.0068] | <b>0.0034</b><br>[0.0026, 0.0044]  | 0.0048<br>[0.0041, 0.0056]        | 0.0038<br>[0.0029, 0.0049]         |
| 1984 | <b>0.0050</b><br>[0.0043, 0.0058] | <b>0.0028</b><br>[0.0021, 0.0037]  | 0.0039<br>[0.0033, 0.0046]        | 0.0037<br>[0.0029, 0.0048]         |
| 1985 | <b>0.0052</b><br>[0.0045, 0.0060] | <b>0.0025</b><br>[0.0018, 0.0035]  | 0.0042<br>[0.0036, 0.0049]        | 0.003<br>[0.0022, 0.0040]          |
| 1986 | <b>0.0048</b><br>[0.0041, 0.0056] | <b>0.0025</b><br>[0.0018, 0.0034]  | 0.0037<br>[0.0031, 0.0043]        | 0.0027<br>[0.0020, 0.0037]         |
| 1987 | <b>0.0051</b><br>[0.0045, 0.0059] | <b>0.0031</b><br>[0.0023, 0.0042]  | 0.0044<br>[0.0038, 0.0051]        | 0.0034<br>[0.0026, 0.0045]         |
| 1988 | <b>0.0054</b><br>[0.0047, 0.0061] | <b>0.0018</b><br>[0.0012, 0.0026]  | <b>0.0044</b><br>[0.0038, 0.0050] | <b>0.0023</b><br>[0.0016, 0.0032]  |
| 1989 | <b>0.0045</b><br>[0.0039, 0.0051] | <b>0.0024</b><br>[0.0017, 0.0034]  | 0.0035<br>[0.0030, 0.0041]        | 0.0028<br>[0.0020, 0.0038]         |
| 1990 | <b>0.0047</b><br>[0.0041, 0.0054] | <b>0.0020</b><br>[0.0013, 0.0028]  | 0.0038<br>[0.0032, 0.0044]        | 0.0026<br>[0.0019, 0.0035]         |
| 1991 | <b>0.0042</b><br>[0.0036, 0.0048] | <b>0.0023</b><br>[0.0017, 0.0033]  | 0.0035<br>[0.0030, 0.0041]        | 0.0026<br>[0.0019, 0.0035]         |
| 1992 | <b>0.0046</b><br>[0.0040, 0.0052] | <b>0.0011</b><br>[0.0007, 0.0019]  | <b>0.0040</b><br>[0.0035, 0.0046] | <b>0.0014</b><br>[0.0009, 0.0022]  |
| 1993 | 0.0038<br>[0.0033, 0.0044]        | 0.0023<br>[0.0016, 0.0033]         | 0.0032<br>[0.0027, 0.0038]        | 0.0038<br>[0.0029, 0.0050]         |
| 1994 | <b>0.0039</b><br>[0.0034, 0.0046] | <b>0.0021</b><br>[0.0015, 0.0031]  | 0.0032<br>[0.0027, 0.0038]        | 0.0037<br>[0.0028, 0.0048]         |
| 1995 | 0.0031<br>[0.0026, 0.0036]        | 0.0017<br>[0.0011, 0.0026]         | 0.0025<br>[0.0021, 0.0030]        | 0.0029<br>[0.0021, 0.0039]         |
| 1996 | <b>0.0029</b><br>[0.0024, 0.0034] | <b>0.0013</b><br>[0.0008, 0.0020]  | 0.0023<br>[0.0019, 0.0027]        | 0.0013<br>[0.0008, 0.0021]         |
| 1997 | <b>0.0032</b><br>[0.0027, 0.0037] | <b>0.0014</b><br>[0.0009, 0.0023]  | 0.0027<br>[0.0023, 0.0033]        | 0.0023<br>[0.0016, 0.0033]         |
| 1998 | 0.0029<br>[0.0024, 0.0034]        | 0.0022<br>[0.0015, 0.0031]         | <b>0.0023</b><br>[0.0019, 0.0028] | <b>0.0041</b><br>[0.0031, 0.0054]  |
| 1999 | <b>0.0030</b><br>[0.0025, 0.0035] | <b>0.0014</b><br>[0.0009, 0.0022]  | 0.0024<br>[0.0020, 0.0029]        | 0.0015<br>[0.0009, 0.0023]         |
| 2000 | <b>0.0029</b><br>[0.0025, 0.0035] | <b>0.0012</b><br>[0.0007, 0.0020]  | 0.0022<br>[0.0018, 0.0027]        | 0.0016<br>[0.0010, 0.0025]         |
| 2001 | 0.0030<br>[0.0025, 0.0036]        | 0.002<br>[0.0013, 0.0030]          | 0.0024<br>[0.0020, 0.0029]        | 0.0026<br>[0.0018, 0.0037]         |
| 2002 | <b>0.0025</b><br>[0.0021, 0.0030] | <b>0.0012</b><br>[0.0007, 0.0020]  | 0.0020<br>[0.0016, 0.0025]        | 0.0014<br>[0.0009, 0.0023]         |
| 2003 | <b>0.0029</b><br>[0.0025, 0.0035] | <b>0.0007</b><br>[0.0003, 0.0014]  | <b>0.0024</b><br>[0.0020, 0.0029] | <b>0.0008</b><br>[0.0004, 0.0015]  |
| 2004 | <b>0.0025</b><br>[0.0021, 0.0030] | <b>0.0010</b><br>[0.0006, 0.0018]  | 0.0021<br>[0.0017, 0.0026]        | 0.0016<br>[0.0010, 0.0025]         |
| 2005 | 0.0021<br>[0.0017, 0.0026]        | 0.0015<br>[0.0009, 0.0025]         | 0.0018<br>[0.0014, 0.0022]        | 0.0024<br>[0.0016, 0.0034]         |

Appendix 3: Unadjusted and Adjusted Effects of Type of Hospital on the Probability of Dying within One Year After Birth (Infant Mortality) According to Year. All Deliveries. Non-Overlapping 95% Confidence Intervals in Bold

| Year | Unadjusted                        |                                   | Propensity score adjusted         |                                   |
|------|-----------------------------------|-----------------------------------|-----------------------------------|-----------------------------------|
|      | Central/regional hospitals        | Local hospitals/maternity clinics | Central/regional hospitals        | Local hospitals/maternity clinics |
| 1980 | <b>0.0090</b><br>[0.0081, 0.0101] | <b>0.0064</b><br>[0.0053, 0.0077] | 0.0076<br>[0.0067, 0.0086]        | 0.0068<br>[0.0057, 0.0081]        |
| 1981 | <b>0.0089</b><br>[0.0080, 0.0100] | <b>0.0056</b><br>[0.0046, 0.0068] | 0.0074<br>[0.0065, 0.0084]        | 0.0061<br>[0.0050, 0.0073]        |
| 1982 | 0.0084<br>[0.0075, 0.0094]        | 0.0065<br>[0.0054, 0.0078]        | 0.0071<br>[0.0063, 0.0081]        | 0.0070<br>[0.0058, 0.0083]        |
| 1983 | <b>0.0097</b><br>[0.0087, 0.0108] | <b>0.0057</b><br>[0.0047, 0.0070] | 0.0083<br>[0.0074, 0.0093]        | 0.0061<br>[0.0050, 0.0074]        |
| 1984 | <b>0.0091</b><br>[0.0081, 0.0102] | <b>0.0063</b><br>[0.0052, 0.0076] | 0.0077<br>[0.0068, 0.0087]        | 0.0070<br>[0.0058, 0.0084]        |
| 1985 | <b>0.0095</b><br>[0.0085, 0.0105] | <b>0.0054</b><br>[0.0044, 0.0068] | <b>0.0082</b><br>[0.0073, 0.0092] | <b>0.0056</b><br>[0.0046, 0.0070] |
| 1986 | <b>0.0089</b><br>[0.0080, 0.0099] | <b>0.0051</b><br>[0.0041, 0.0064] | 0.0075<br>[0.0066, 0.0084]        | 0.0055<br>[0.0045, 0.0069]        |
| 1987 | 0.0089<br>[0.0080, 0.0099]        | 0.0065<br>[0.0054, 0.0080]        | 0.0079<br>[0.0070, 0.0088]        | 0.0073<br>[0.0060, 0.0088]        |
| 1988 | <b>0.0096</b><br>[0.0087, 0.0106] | <b>0.005</b><br>[0.0040, 0.0063]  | <b>0.0084</b><br>[0.0076, 0.0093] | <b>0.0051</b><br>[0.0041, 0.0064] |
| 1989 | <b>0.0087</b><br>[0.0079, 0.0096] | <b>0.0052</b><br>[0.0041, 0.0065] | 0.0075<br>[0.0067, 0.0083]        | 0.0056<br>[0.0045, 0.0070]        |
| 1990 | <b>0.0077</b><br>[0.0069, 0.0085] | <b>0.0044</b><br>[0.0034, 0.0056] | 0.0066<br>[0.0059, 0.0074]        | 0.0050<br>[0.0040, 0.0063]        |
| 1991 | 0.0065<br>[0.0058, 0.0073]        | 0.0046<br>[0.0036, 0.0058]        | 0.0056<br>[0.0049, 0.0063]        | 0.0051<br>[0.0040, 0.0063]        |
| 1992 | <b>0.0066</b><br>[0.0059, 0.0074] | <b>0.0029</b><br>[0.0021, 0.0039] | <b>0.0059</b><br>[0.0052, 0.0066] | <b>0.0032</b><br>[0.0024, 0.0043] |
| 1993 | <b>0.0057</b><br>[0.0050, 0.0064] | <b>0.0036</b><br>[0.0028, 0.0048] | 0.0050<br>[0.0044, 0.0057]        | 0.0050<br>[0.0039, 0.0063]        |
| 1994 | <b>0.0056</b><br>[0.0050, 0.0064] | <b>0.0035</b><br>[0.0026, 0.0046] | 0.0046<br>[0.0040, 0.0053]        | 0.0052<br>[0.0041, 0.0065]        |
| 1995 | 0.0044<br>[0.0039, 0.0051]        | 0.0030<br>[0.0022, 0.0040]        | 0.0037<br>[0.0032, 0.0044]        | 0.0041<br>[0.0032, 0.0053]        |
| 1996 | <b>0.0044</b><br>[0.0039, 0.0051] | <b>0.0026</b><br>[0.0019, 0.0036] | 0.0036<br>[0.0031, 0.0042]        | 0.0028<br>[0.0020, 0.0038]        |
| 1997 | 0.0043<br>[0.0037, 0.0049]        | 0.0029<br>[0.0021, 0.0040]        | 0.0038<br>[0.0033, 0.0044]        | 0.0039<br>[0.0030, 0.0052]        |
| 1998 | 0.0042<br>[0.0037, 0.0049]        | 0.0032<br>[0.0024, 0.0043]        | <b>0.0034</b><br>[0.0029, 0.0040] | <b>0.0053</b><br>[0.0042, 0.0067] |
| 1999 | <b>0.0044</b><br>[0.0038, 0.0050] | <b>0.0024</b><br>[0.0017, 0.0034] | 0.0037<br>[0.0032, 0.0043]        | 0.0024<br>[0.0017, 0.0034]        |
| 2000 | <b>0.0043</b><br>[0.0037, 0.0049] | <b>0.0019</b><br>[0.0013, 0.0029] | 0.0035<br>[0.0030, 0.0040]        | 0.0022<br>[0.0015, 0.0032]        |
| 2001 | 0.0041<br>[0.0035, 0.0047]        | 0.0024<br>[0.0016, 0.0035]        | 0.0034<br>[0.0029, 0.0040]        | 0.0032<br>[0.0023, 0.0044]        |
| 2002 | <b>0.0035</b><br>[0.0030, 0.0041] | <b>0.0018</b><br>[0.0011, 0.0027] | 0.0030<br>[0.0025, 0.0035]        | 0.0019<br>[0.0013, 0.0030]        |
| 2003 | <b>0.0042</b><br>[0.0037, 0.0049] | <b>0.0012</b><br>[0.0007, 0.0021] | <b>0.0036</b><br>[0.0030, 0.0042] | <b>0.0014</b><br>[0.0008, 0.0023] |
| 2004 | <b>0.0035</b><br>[0.0030, 0.0041] | <b>0.0018</b><br>[0.0012, 0.0028] | 0.0030<br>[0.0025, 0.0035]        | 0.0028<br>[0.0020, 0.0040]        |
| 2005 | 0.0028<br>[0.0024, 0.0034]        | 0.0022<br>[0.0015, 0.0033]        | 0.0024<br>[0.0020, 0.0029]        | 0.0034<br>[0.0025, 0.0046]        |

Appendix 4: Unadjusted and Adjusted Effects of Type of Hospital on the Probability of Dying within One Month After Birth (Neonatal Mortality) According to Year. Deliveries With Birthweight  $\leq$  2500g. Non-Overlapping 95% Confidence Intervals in Bold

| Year | Unadjusted                               |                                          | Propensity score adjusted                |                                          |
|------|------------------------------------------|------------------------------------------|------------------------------------------|------------------------------------------|
|      | Central/regional hospitals               | Local hospitals/ maternity clinics       | Central/regional hospitals               | Local hospitals/ maternity clinics       |
| 1980 | 0.0785<br>[0.0661, 0.0931]               | 0.0623<br>[0.0424, 0.0906]               | 0.0716<br>[0.0598, 0.0857]               | 0.0717<br>[0.0502, 0.1014]               |
| 1981 | 0.0744<br>[0.0624, 0.0884]               | 0.0507<br>[0.0329, 0.0773]               | 0.0680<br>[0.0566, 0.0816]               | 0.0638<br>[0.0435, 0.0926]               |
| 1982 | <b>0.0786</b><br><b>[0.0663, 0.0930]</b> | <b>0.0367</b><br><b>[0.0222, 0.0600]</b> | 0.0712<br>[0.0595, 0.0850]               | 0.0393<br>[0.0242, 0.0631]               |
| 1983 | 0.075<br>[0.0634, 0.0887]                | 0.0530<br>[0.0341, 0.0816]               | 0.0771<br>[0.0652, 0.0908]               | 0.0521<br>[0.0333, 0.0805]               |
| 1984 | 0.0701<br>[0.0590, 0.0831]               | 0.0712<br>[0.0481, 0.1040]               | 0.0686<br>[0.0577, 0.0815]               | 0.0855<br>[0.0600, 0.1203]               |
| 1985 | 0.0684<br>[0.0577, 0.0808]               | 0.0558<br>[0.0363, 0.0850]               | 0.0659<br>[0.0555, 0.0781]               | 0.0687<br>[0.0467, 0.1000]               |
| 1986 | 0.0612<br>[0.0512, 0.0730]               | 0.0578<br>[0.0380, 0.0870]               | 0.0574<br>[0.0478, 0.0689]               | 0.0586<br>[0.0386, 0.0880]               |
| 1987 | 0.0633<br>[0.0536, 0.0745]               | 0.0409<br>[0.0243, 0.0679]               | 0.0596<br>[0.0502, 0.0705]               | 0.0460<br>[0.0282, 0.0740]               |
| 1988 | 0.0732<br>[0.0632, 0.0845]               | 0.0468<br>[0.0279, 0.0774]               | 0.0674<br>[0.0578, 0.0783]               | 0.0542<br>[0.0336, 0.0864]               |
| 1989 | 0.0566<br>[0.0480, 0.0666]               | 0.0443<br>[0.0259, 0.0749]               | 0.0534<br>[0.0451, 0.0632]               | 0.0446<br>[0.0261, 0.0751]               |
| 1990 | 0.0692<br>[0.0598, 0.0798]               | 0.0387<br>[0.0221, 0.0669]               | 0.0653<br>[0.0562, 0.0757]               | 0.0413<br>[0.0241, 0.0701]               |
| 1991 | 0.0554<br>[0.0472, 0.0649]               | 0.0252<br>[0.0126, 0.0496]               | 0.0538<br>[0.0457, 0.0631]               | 0.0287<br>[0.0151, 0.0540]               |
| 1992 | <b>0.0588</b><br><b>[0.0502, 0.0687]</b> | <b>0.0183</b><br><b>[0.0076, 0.0432]</b> | 0.0578<br>[0.0493, 0.0677]               | 0.0248<br>[0.0118, 0.0516]               |
| 1993 | 0.0465<br>[0.0388, 0.0556]               | 0.0448<br>[0.0256, 0.0772]               | 0.0449<br>[0.0373, 0.0539]               | 0.0759<br>[0.0497, 0.1141]               |
| 1994 | 0.0470<br>[0.0394, 0.0560]               | 0.0606<br>[0.0374, 0.0966]               | <b>0.4383</b><br><b>[0.0365, 0.0525]</b> | <b>0.0890</b><br><b>[0.0602, 0.1297]</b> |
| 1995 | 0.0364<br>[0.0297, 0.0446]               | 0.0447<br>[0.0256, 0.0771]               | 0.0322<br>[0.0259, 0.0399]               | 0.0594<br>[0.0368, 0.0947]               |
| 1996 | 0.0343<br>[0.0279, 0.0421]               | 0.0166<br>[0.0062, 0.0435]               | 0.0304<br>[0.0244, 0.0377]               | 0.0149<br>[0.0053, 0.0411]               |
| 1997 | 0.0339<br>[0.0275, 0.0417]               | 0.0272<br>[0.0123, 0.0593]               | 0.0333<br>[0.0270, 0.0410]               | 0.0393<br>[0.0203, 0.0747]               |
| 1998 | 0.0362<br>[0.0295, 0.0444]               | 0.0442<br>[0.0239, 0.0802]               | <b>0.0332</b><br><b>[0.0268, 0.0411]</b> | <b>0.0999</b><br><b>[0.0673, 0.1459]</b> |
| 1999 | 0.0361<br>[0.0297, 0.0440]               | 0.0238<br>[0.0099, 0.0559]               | 0.0345<br>[0.0282, 0.0421]               | 0.0228<br>[0.0094, 0.0542]               |
| 2000 | 0.0354<br>[0.0291, 0.0431]               | 0.0312<br>[0.0141, 0.0677]               | 0.0334<br>[0.0273, 0.0409]               | 0.0371<br>[0.0179, 0.0752]               |
| 2001 | 0.0341<br>[0.0278, 0.0417]               | 0.0301<br>[0.0136, 0.0654]               | 0.0325<br>[0.0264, 0.0400]               | 0.0418<br>[0.0214, 0.0801]               |
| 2002 | 0.0286<br>[0.0229, 0.0357]               | 0.0257<br>[0.0107, 0.0604]               | 0.0270<br>[0.0215, 0.0339]               | 0.0242<br>[0.0099, 0.0579]               |
| 2003 | 0.0334<br>[0.0272, 0.0410]               | 0.0149<br>[0.0048, 0.0452]               | 0.0326<br>[0.0265, 0.0400]               | 0.0121<br>[0.0035, 0.0415]               |
| 2004 | 0.0287<br>[0.0229, 0.0358]               | 0.0207<br>[0.0078, 0.0539]               | 0.0277<br>[0.0221, 0.0347]               | 0.0092<br>[0.0021, 0.0389]               |
| 2005 | 0.0248<br>[0.0194, 0.0316]               | 0.0253<br>[0.0095, 0.0655]               | 0.0234<br>[0.0183, 0.0300]               | 0.0542<br>[0.0287, 0.1002]               |

Appendix 5: Unadjusted and Adjusted Effects of Type of Hospital on the Probability of Dying within One Year After Birth (Infant Mortality) According to Year. Deliveries With Birth Weight  $\leq$  2500g. Non-Overlapping 95% Confidence Intervals in Bold

| Year | Unadjusted                               |                                          | Propensity score adjusted                |                                          |
|------|------------------------------------------|------------------------------------------|------------------------------------------|------------------------------------------|
|      | Central/regional hospitals               | Local hospitals/ maternity clinics       | Central/regional hospitals               | Local hospitals/ maternity clinics       |
| 1980 | 0.0929<br>[0.0794, 0.1086]               | 0.0748<br>[0.0528, 0.1049]               | 0.0865<br>[0.0735, 0.1017]               | 0.0807<br>[0.0578, 0.1117]               |
| 1981 | 0.0903<br>[0.0771, 0.1056]               | 0.0583<br>[0.0390, 0.0863]               | 0.0821<br>[0.0695, 0.0967]               | 0.0749<br>[0.0527, 0.1054]               |
| 1982 | <b>0.0901</b><br><b>[0.0769, 0.1052]</b> | <b>0.0490</b><br><b>[0.0318, 0.0747]</b> | 0.0827<br>[0.0701, 0.0974]               | 0.0515<br>[0.0338, 0.0776]               |
| 1983 | 0.0917<br>[0.0788, 0.1065]               | 0.0642<br>[0.0430, 0.0948]               | 0.0922<br>[0.0793, 0.1070]               | 0.0607<br>[0.0402, 0.0907]               |
| 1984 | 0.0863<br>[0.0739, 0.1004]               | 0.0801<br>[0.0555, 0.1143]               | 0.0835<br>[0.0714, 0.0975]               | 0.0919<br>[0.0654, 0.1276]               |
| 1985 | 0.0889<br>[0.0767, 0.1027]               | 0.0754<br>[0.0522, 0.1077]               | 0.0864<br>[0.0745, 0.1001]               | 0.0871<br>[0.0620, 0.1211]               |
| 1986 | 0.0825<br>[0.0709, 0.0959]               | 0.0688<br>[0.0469, 0.0999]               | 0.0777<br>[0.0664, 0.0907]               | 0.0714<br>[0.0490, 0.1028]               |
| 1987 | 0.0809<br>[0.0699, 0.0933]               | 0.0672<br>[0.0450, 0.0991]               | 0.0777<br>[0.0670, 0.0900]               | 0.0784<br>[0.0542, 0.1120]               |
| 1988 | 0.0923<br>[0.0811, 0.1049]               | 0.0568<br>[0.0356, 0.0895]               | 0.0882<br>[0.0772, 0.1005]               | 0.0570<br>[0.0357, 0.0897]               |
| 1989 | 0.0796<br>[0.0694, 0.0912]               | 0.0511<br>[0.0310, 0.0831]               | 0.0770<br>[0.0669, 0.0884]               | 0.0481<br>[0.0288, 0.0793]               |
| 1990 | <b>0.0877</b><br><b>[0.0772, 0.0995]</b> | <b>0.0451</b><br><b>[0.0269, 0.0747]</b> | 0.0844<br>[0.0741, 0.0960]               | 0.0481<br>[0.0292, 0.0784]               |
| 1991 | <b>0.0688</b><br><b>[0.0597, 0.0792]</b> | <b>0.0315</b><br><b>[0.0170, 0.0576]</b> | 0.0669<br>[0.0579, 0.0772]               | 0.0372<br>[0.0212, 0.0646]               |
| 1992 | <b>0.0705</b><br><b>[0.0610, 0.0812]</b> | <b>0.0219</b><br><b>[0.0099, 0.0480]</b> | <b>0.0700</b><br><b>[0.0606, 0.0807]</b> | <b>0.0265</b><br><b>[0.0128, 0.0537]</b> |
| 1993 | 0.0564<br>[0.0478, 0.0663]               | 0.0485<br>[0.0283, 0.0817]               | 0.0549<br>[0.0466, 0.0647]               | 0.0782<br>[0.0516, 0.1168]               |
| 1994 | 0.0597<br>[0.0511, 0.0696]               | 0.0681<br>[0.0433, 0.1056]               | <b>0.0552</b><br><b>[0.0470, 0.0648]</b> | <b>0.0997</b><br><b>[0.0691, 0.1420]</b> |
| 1995 | 0.0438<br>[0.0364, 0.0527]               | 0.0447<br>[0.0256, 0.0771]               | 0.0404<br>[0.0334, 0.0490]               | 0.0594<br>[0.0368, 0.0947]               |
| 1996 | 0.0448<br>[0.0374, 0.0535]               | 0.0250<br>[0.0112, 0.0545]               | 0.0409<br>[0.0339, 0.0492]               | 0.0234<br>[0.0103, 0.0523]               |
| 1997 | 0.0406<br>[0.0336, 0.0490]               | 0.0318<br>[0.0152, 0.0652]               | 0.0401<br>[0.0332, 0.0485]               | 0.0428<br>[0.0227, 0.0790]               |
| 1998 | 0.0453<br>[0.0377, 0.0543]               | 0.053<br>[0.0303, 0.0911]                | <b>0.0407</b><br><b>[0.0336, 0.0493]</b> | <b>0.1102</b><br><b>[0.0757, 0.1576]</b> |
| 1999 | 0.0414<br>[0.0345, 0.0497]               | 0.0285<br>[0.0128, 0.0621]               | 0.0403<br>[0.0334, 0.0485]               | 0.0228<br>[0.0094, 0.0542]               |
| 2000 | 0.0436<br>[0.0365, 0.0519]               | 0.0364<br>[0.0174, 0.0744]               | 0.0413<br>[0.0345, 0.0495]               | 0.0371<br>[0.0179, 0.0752]               |
| 2001 | 0.0405<br>[0.0336, 0.0488]               | 0.0402<br>[0.0202, 0.0783]               | 0.0384<br>[0.0317, 0.0464]               | 0.0524<br>[0.0289, 0.0933]               |
| 2002 | 0.0358<br>[0.0293, 0.0435]               | 0.0257<br>[0.0107, 0.0604]               | 0.0345<br>[0.0282, 0.0421]               | 0.0242<br>[0.0099, 0.0579]               |
| 2003 | 0.0436<br>[0.0365, 0.0521]               | 0.0199<br>[0.0074, 0.0518]               | 0.0427<br>[0.0357, 0.0510]               | 0.0223<br>[0.0089, 0.0548]               |
| 2004 | 0.0344<br>[0.0281, 0.0421]               | 0.0362<br>[0.0173, 0.0741]               | 0.0343<br>[0.02580, 0.0420]              | 0.0193<br>[0.0070, 0.0518]               |
| 2005 | 0.0291<br>[0.0232, 0.0363]               | 0.0379<br>[0.0171, 0.0819]               | 0.0283<br>[0.0226, 0.0355]               | 0.0688<br>[0.0392, 0.1180]               |

Appendix 6: The Effects of Neonatal and Infant Mortality on Local Hospital Closure (=1). Risk Factors and Year Fixed Effects Included, but Not Reported

| <i>Hospital Identification</i> | <i>N</i> | <i>Independent Variables</i> |                  |                         |                  |
|--------------------------------|----------|------------------------------|------------------|-------------------------|------------------|
|                                |          | <i>Neonatal Mortality</i>    |                  | <i>Infant Mortality</i> |                  |
|                                |          | <i>Coefficient</i>           | <i>Std Error</i> | <i>Coefficient</i>      | <i>Std Error</i> |
| A                              | 28 178   | -0.0056                      | 0.0158           | 0.0005                  | 0.0128           |
| B                              | 26 913   | 0.0131                       | 0.0071           | 0.0105                  | 0.0057           |
| C                              | 26 358   | 0.0172                       | 0.0100           | 0.0099                  | 0.0079           |
| D                              | 26 271   | 0.0059                       | 0.0088           | -0.0027                 | 0.0069           |
| E                              | 26 684   | -0.0232                      | 0.0155           | 0.0010                  | 0.0114           |
| F                              | 27 974   | -0.0192                      | 0.0232           | -0.2406                 | 0.0169           |
| G                              | 30 338   | -0.0528                      | 0.0270           | -0.0382                 | 0.0197           |
| H                              | 29 083   | 0.0138                       | 0.0208           | 0.0101                  | 0.0153           |
| I                              | 28 872   | -0.0255                      | 0.0200           | -0.0354 *               | 0.0148           |
| J                              | 27 877   | 0.0166                       | 0.0094           | 0.0142                  | 0.0069           |
| K                              | 32 594   | -0.0010                      | 0.0132           | 0.0271 *                | 0.0103           |
| L                              | 32 778   | 0.0037                       | 0.0155           | -0.0067                 | 0.0124           |
| M                              | 35 448   | 0.0304                       | 0.0357           | 0.0185                  | 0.0289           |

\* p < 0.05

*Note.* The following risk factors were included in all analyses:

Mother's age, immigrant status (non-western, western), level of education (upper secondary school, university/college), marital status.

Predisposing factors of the mother: asthma, diabetes, epilepsy, heart disease, chronic hypertension, chronic kidney failure, rheumatoid arthritis, preeclampsia, bleeding during pregnancy.

Characteristics of the birth: birthweight ≤ 2500 g, gestation length ≤ 37 weeks, abnormal presentation, single baby birth, previous Caesarean section, infant boy.
